# Supplementary material for: Iron and nitrogen co-doped carbon nanotube@hollow carbon fibers derived from plant biomass as efficient catalysts for the oxygen reduction reaction
Source: Royal Society of Chemistry journal article supplement (doi:10.1039/c5ta00958h), 2015-01-01
Supplement: c5ta00958h1.pdf [file c5ta00958h1.pdf]

## Electronic Supplementary Information

**Iron and nitrogen co-doped carbon nanotubes@hollow carbon fibers  
derived from plant biomass as efficient catalysts for oxygen reduction  
reaction**

**Mian Li,<sup>a</sup> Yueping Xiong,<sup>b</sup> Xiaotian Liu,<sup>b</sup> Ce Han,<sup>a</sup> Yufan Zhang,<sup>a</sup> Xiangjie Bo<sup>\*a</sup>  
and Liping Guo<sup>\*a</sup>**

<sup>a</sup> *Faculty of Chemistry, Northeast Normal University, Changchun, 130024, P. R.  
China*

<sup>b</sup> *School of Chemical Engineering and Technology, Harbin Institute of Technology,  
Harbin 150001, China*

<sup>\*</sup> Corresponding authors

Tel.: +86-0431-85099762.

Fax: +86-0431-85099762.

E-mail address: baobj133@nenu.edu.cn (X. Bo); guolp078@nenu.edu.cn (L. Guo).

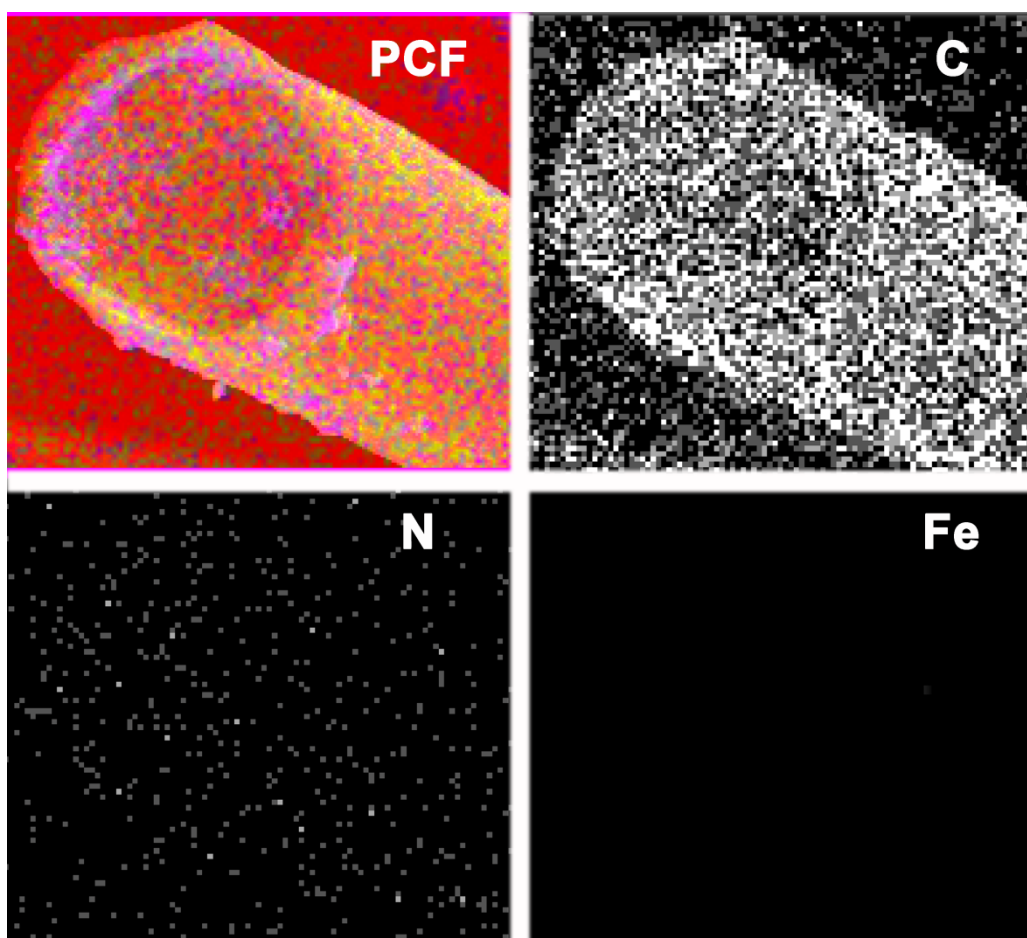

Fig. S1 Elemental mapping spectra of C, N, and Fe for the PCF composite. In the colorized image red represents the C elements and blue represents the N elements.

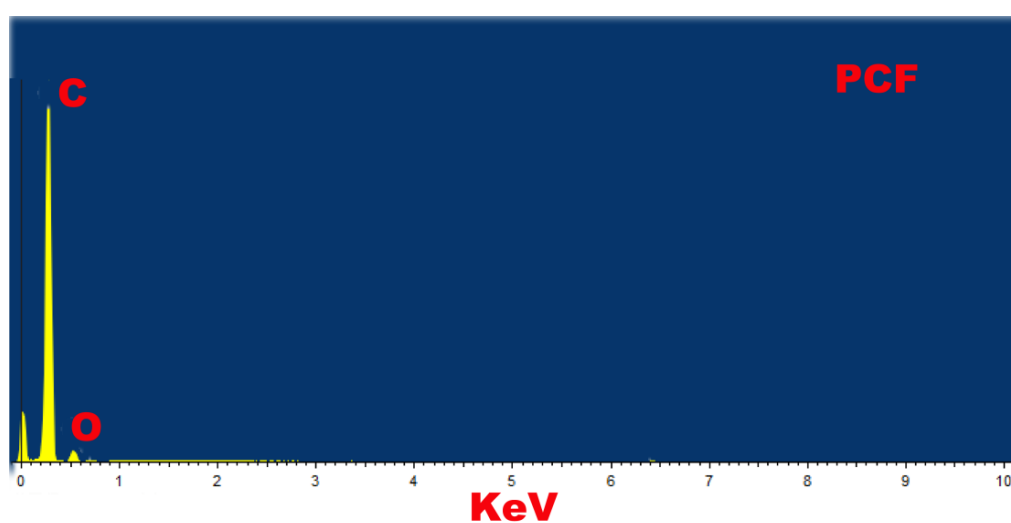

Fig. S2 EDX spectrum of the PCF.

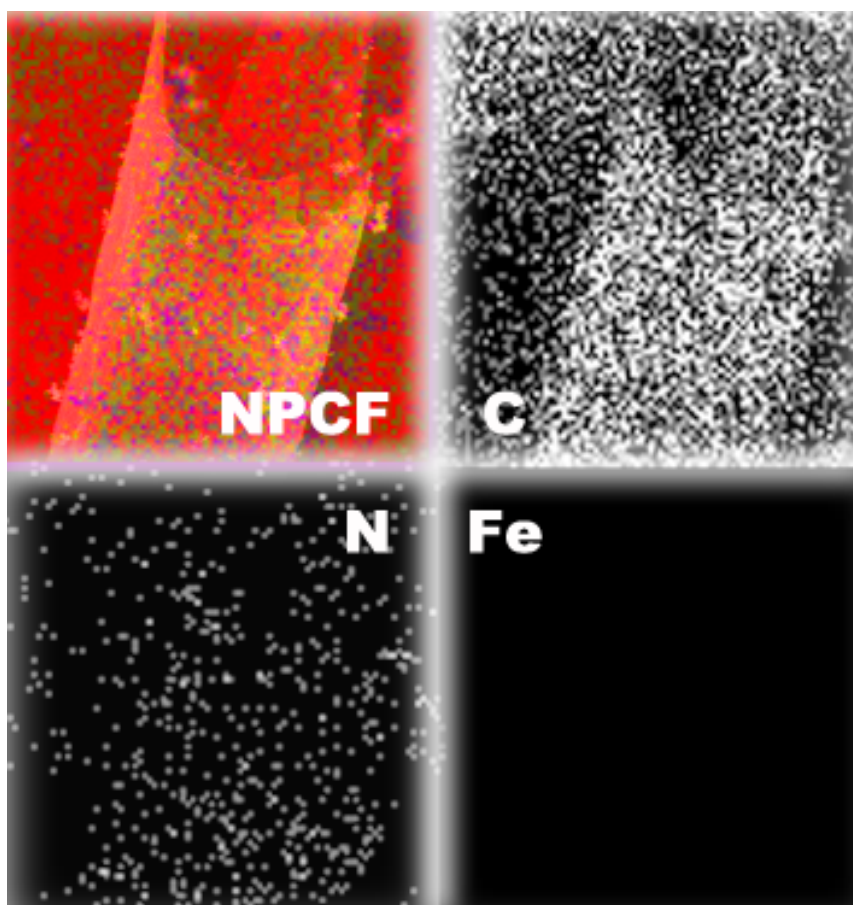

Fig. S3 Elemental mapping spectra of C, N, and Fe for the N/PCF composite. In the colorized image red represents the C elements and blue represents the N elements.

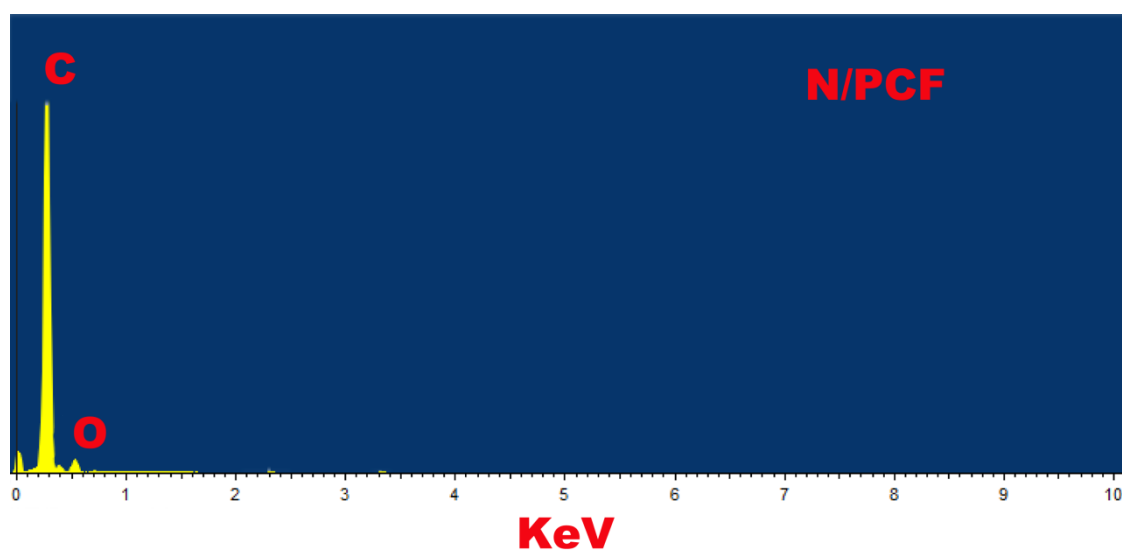

Fig. S4 EDX spectrum of the N/PCF.

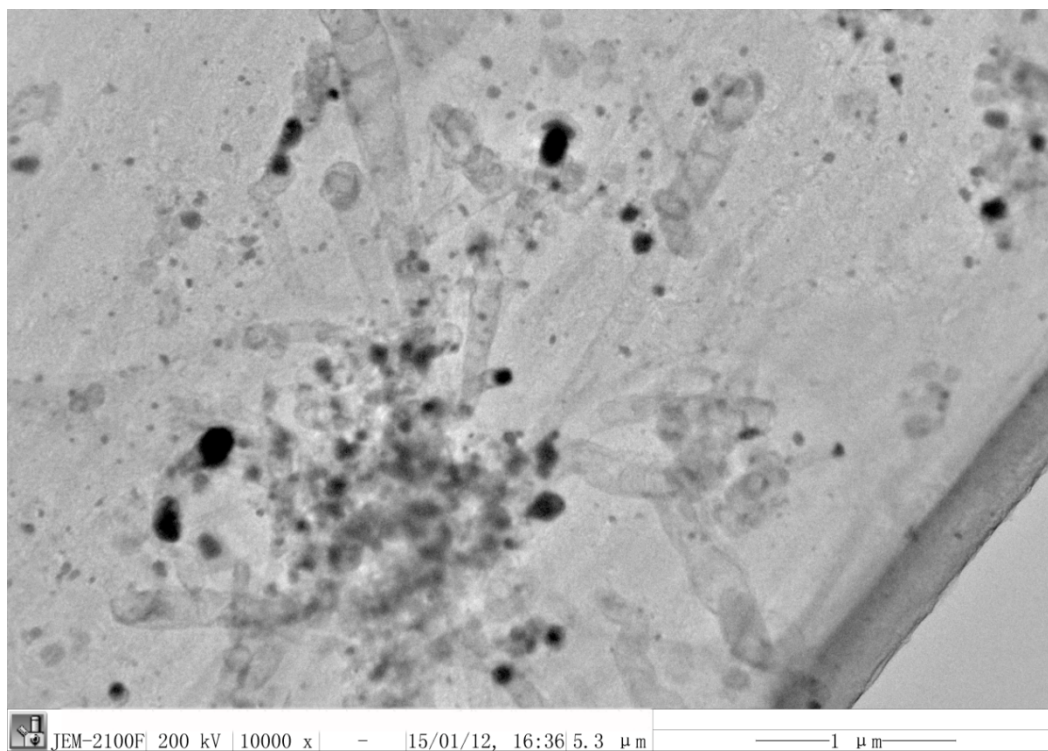

Fig. S5 TEM image of the Fe/N/CNT@PCF sample before the acid pickling process in 2 M  $\text{H}_2\text{SO}_4$ .

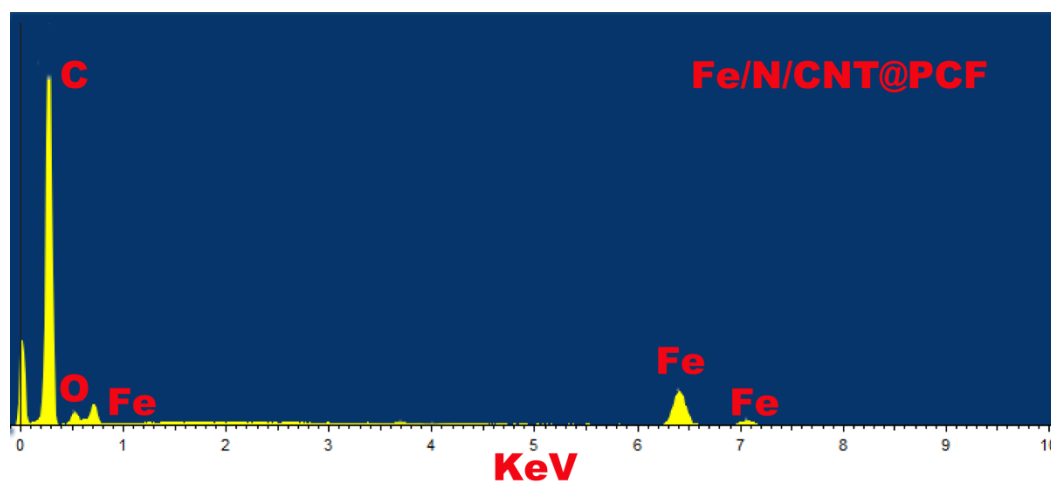

Fig. S6 EDX spectrum of the Fe/N/CNT@PCF before the acid pickling process in 2 M  $\text{H}_2\text{SO}_4$ .

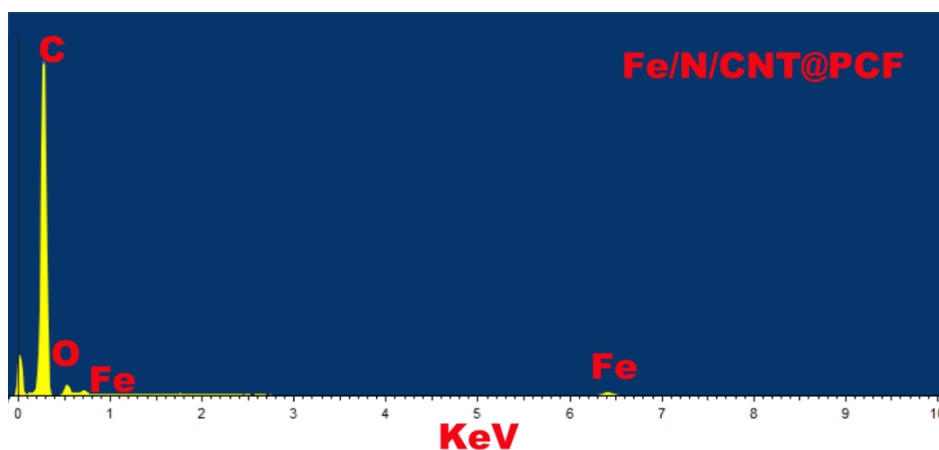

Fig. S7 EDX spectrum of the Fe/N/CNT@PCF after the acid pickling process in 2 M  $\text{H}_2\text{SO}_4$ .

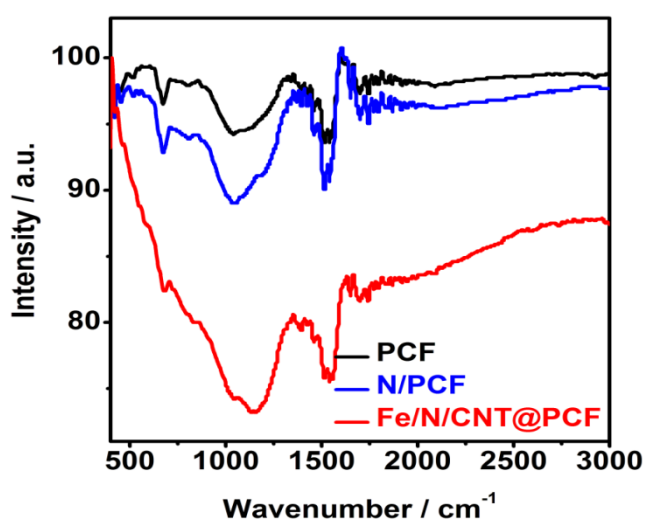

Fig. S8 FT-IR spectra of the PCF, N/PCF, and Fe/N/CNT@PCF samples.

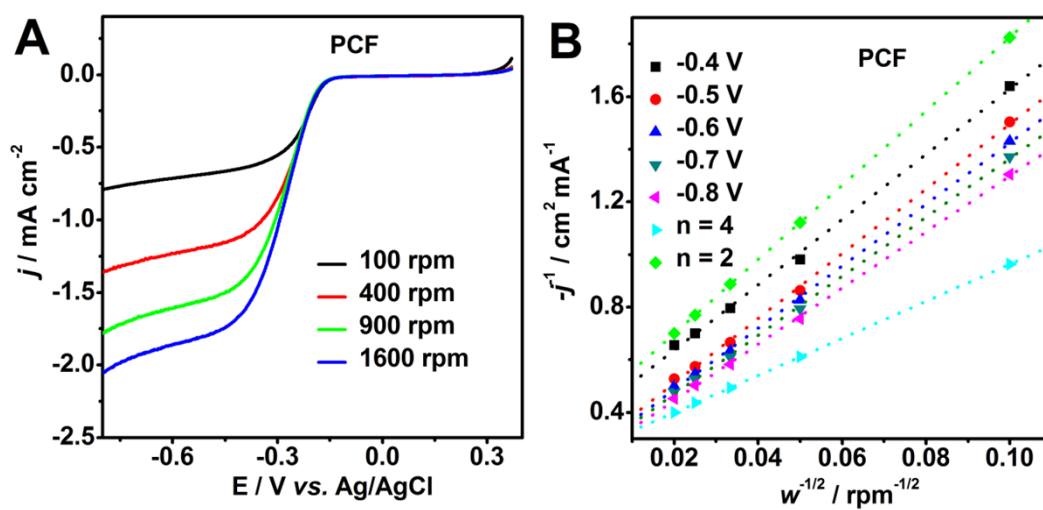

Fig. S9 (A) RDE voltammograms of the PCF in  $\text{O}_2$ -saturated 0.1 M KOH with various rotation rates at a scan rate of  $5 \text{ mV s}^{-1}$ . (B) The corresponding Koutecky–Levich plots of the PCF catalyst at different potential.
